# Supplementary material for: Prognostic value of neonatal EEG following therapeutic hypothermia in survivors of hypoxic-ischemic encephalopathy
Source: PubMed Central journal article supplement (PMC8407358; doi:10.1016/j.clinph.2021.05.031), 2021-09

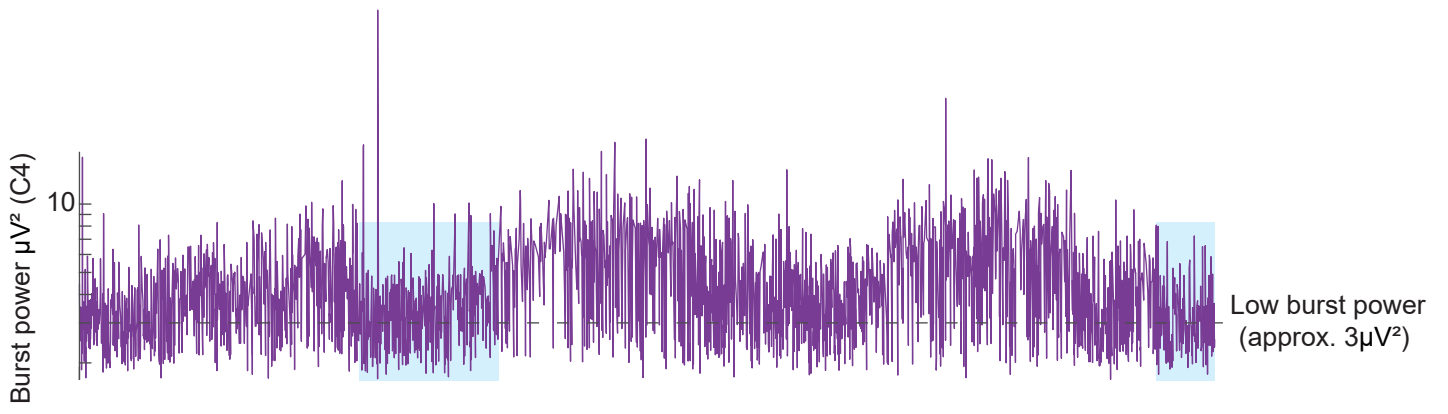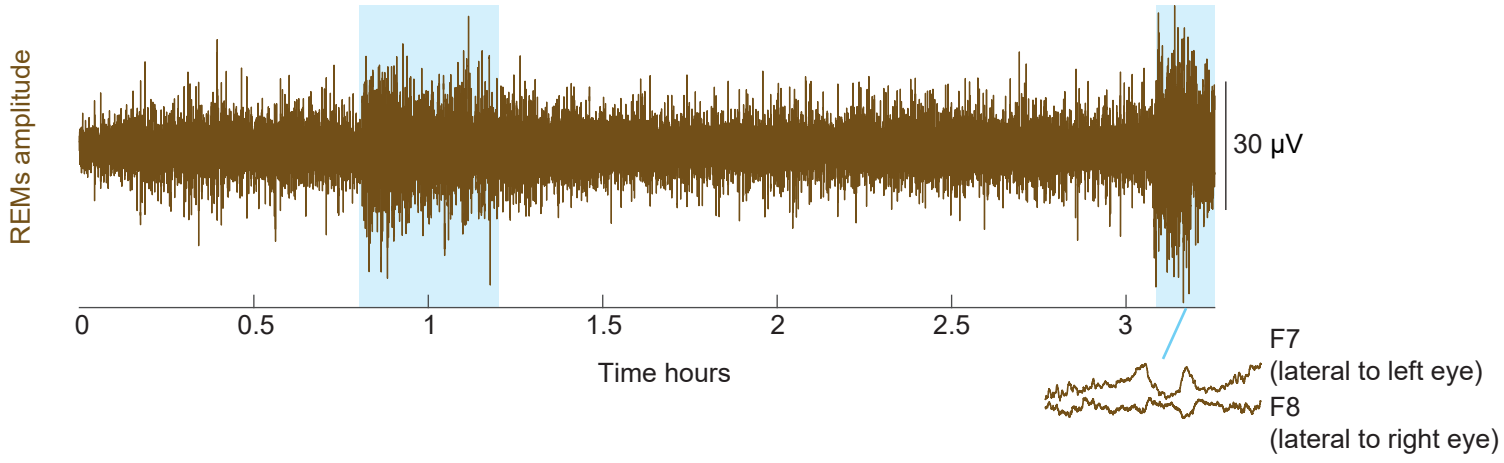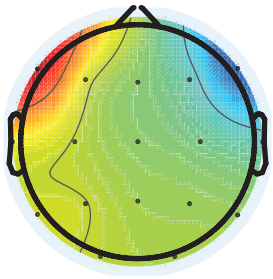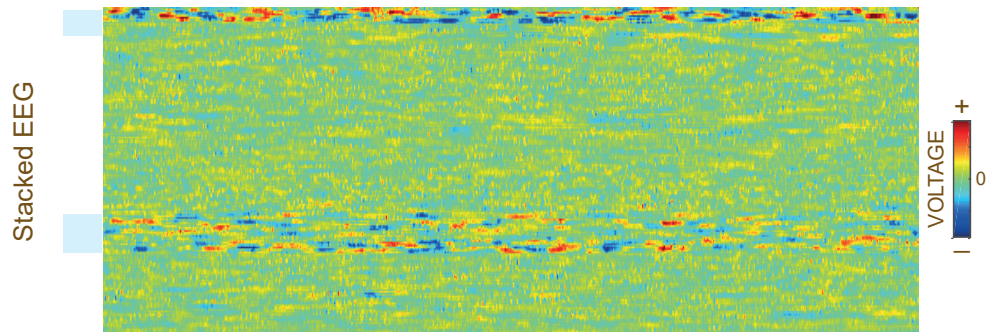

Supplement: mmc3.pdf [file mmc3.pdf]
